1 Short title: Hydropower impacts on Amazonian wildlife  
2 Understanding hydropower impacts on Amazonian wildlife is limited by a lack of robust  
3 evidence: results from a systematic review  
4

5 Eduardo Rodrigues dos Santos<sup>1,2</sup>, Fernanda Michalski<sup>1,2,3</sup>, Darren Norris<sup>\*1,2,4</sup>

6 <sup>1</sup> Postgraduate Programme in Tropical Biodiversity, Federal University of Amapá, Macapá,  
7 Amapá, Brazil

8 <sup>2</sup> Ecology and Conservation of Amazonian Vertebrates Research Group, Federal University of  
9 Amapá, Macapá, Amapá, Brazil

10 <sup>3</sup> Instituto Pró-Carnívoros, Atibaia, São Paulo, Brazil

11 <sup>4</sup> School of Environmental Sciences, Federal University of Amapá, Macapá, Amapá, Brazil

12

13 \*Corresponding Author:

14 Darren Norris,

15 Ecology and Conservation of Amazonian Vertebrates Research Group

16 Federal University of Amapá

17 Rod. Juscelino Kubitschek Km 02, 68903-419 Macapá, Brazil.

18 Email: [dnorris75@gmail.com](mailto:dnorris75@gmail.com)

19

20

21 Keywords: Amazon, dam, evidence based conservation, hydropower, impact evaluation, study

22 design, vertebrates

23

24

25 Abstract

26 **Background and Research Aims:** Although hydropower provides energy to fuel economic  
27 development across Amazonia, strategies to minimize or mitigate impacts in highly biodiverse  
28 Amazonian environments remain unclear. The growing number of operational and planned  
29 hydroelectrics requires robust scientific evidence to evaluate impacts of these projects on  
30 Amazonian vertebrates. Here we investigated the existing scientific knowledge base  
31 documenting impacts of hydropower developments on vertebrates across Brazilian Amazonia.

32 **Methods:** We reviewed the scientific literature from 1945 to 2020 published in English, Spanish  
33 and Portuguese to assess the temporal and spatial patterns in publications and the types of study  
34 design adopted as well as scientific evidence presented.

35 **Results:** A total of 24 published articles documented impacts on fish (n = 20), mammals (n = 3)  
36 and freshwater turtles (n = 1). Most study designs (87.5%) lacked appropriate controls and only  
37 three studies adopted more robust Before-After-Control-Impact designs. The published evidence  
38 did not generally support causal inference with only two studies (8.3%) including appropriate  
39 controls and/or confounding variables.

40 **Conclusion:** Decades of published assessments (54.2% of which were funded by hydropower  
41 developers or their subsidiaries) do not appear to have established robust evidence of impacts of  
42 hydropower developments on Amazonian vertebrates. This lack of robust evidence could limit  
43 the development of effective minimization and mitigation actions for the diverse vertebrate  
44 groups impacted by hydroelectrics across Brazilian Amazonia.

45 **Implications for Conservation:** To avoid misleading inferences there is a need to integrate  
46 more robust study designs into impact assessments of hydropower developments in the Brazilian  
47 Amazon.

## 48 **Introduction**

49 The development and operation of hydroelectric power plants generates multiple environmental  
50 and social impacts across tropical regions, ranging from habitat destruction to changes in river  
51 flow, habitat fragmentation, and overhunting (Aurelio-Silva et al., 2016; Benchimol & Peres,  
52 2015; Bueno & Peres, 2019; Cosson et al., 1999; Palmeirim et al., 2017). The increasing number  
53 of hydroelectrics in tropical rivers means there is an urgent need to understand impacts to  
54 establish minimization and mitigation actions necessary to ensure sustainability of these  
55 developments. To date evidence documenting impacts is limited, for example the only synthesis  
56 at the Environmental Evidence database is on impacts to fish mortality (Algera et al., 2020) and  
57 fish productivity (Rytwinski et al., 2020) in temperate regions  
58 (<https://environmentalevidence.org/completed-reviews/?search=dam>, accessed 14 July 2021).

59 In South America, hydropower projects with reservoirs and run-of-river dams are  
60 common (Finer & Jenkins, 2012). For example, in 2021 Brazilian Amazonia has 29 operational  
61 hydroelectric power plants (including only those with installed power > 30 MW) and an  
62 additional 93 in process of regularization and construction (SIGEL, 2021). Projects with  
63 reservoir storage (e.g. Balbina dam in Brazil), make it possible to adjust the level of water to  
64 produce energy during periods of water scarcity, which can make substantial changes to both the  
65 landscape and water flow (Egré & Milewski, 2002; Fearnside, 1989). Projects using run-of-river  
66 dams use the natural river flow to generate energy and can therefore reduce environmental  
67 impacts in certain cases (Egré & Milewski, 2002). Yet due to highly seasonal rainfall and river  
68 flow rates the vast majority of Amazonian run-of-river dams include reservoirs e.g. Belo Monte  
69 (Fearnside, 2006; Hall & Branford, 2012) and as such generate drastic impacts on flowrates  
70 (Mendes et al., 2021).

71           The Amazon rainforest is renowned for its globally important biodiversity and  
72 availability of hydric resources (Dirzo & Raven, 2003; Malhi et al., 2008). The Amazon basin  
73 has a large vertebrate biodiversity (Silva et al., 2005). For example, the total number of  
74 freshwater fish species present in the Amazon basin represents ~15% of all freshwater fishes  
75 described worldwide (Jézéquel et al., 2020). Similarly, for three groups of terrestrial vertebrates  
76 (birds, mammals and amphibians), the Brazilian Amazon has a higher overall species richness  
77 compared with other Brazilian biomes (Jenkins et al., 2015). Vertebrates have great importance  
78 in the management of tropical forest ecosystems (Janzen, 1970). This includes seed dispersal,  
79 predation, regulation of water quality, and nutrient and carbon cycles in both terrestrial and  
80 aquatic ecosystems (Böhm et al., 2013; Fletcher et al., 2006; Raxworthy et al., 2008).

81           Amazon biodiversity is increasingly threatened by several factors, including habitat loss  
82 and fragmentation and climate change (Dudgeon et al., 2006; Laurance et al., 2011; Li et al.,  
83 2013; Malhi et al., 2008; Michalski & Peres, 2007; Schneider et al., 2021). One of the major  
84 threats to Amazonian biodiversity identified by the International Union for Conservation of  
85 Nature is the construction of hydroelectric power plants (IUCN, 2020). These constructions  
86 make a direct impact on the local environment and an indirect impact on a large scale, extending  
87 through the entire hydrology basin that is inserted (Carvalho et al., 2018). Expansion of  
88 hydropower developments in the Brazilian Amazon started in the 1980s (Fearnside, 2001; Junk  
89 et al., 1981), but only since 1986 does Brazilian legislation requires that developers need to  
90 produce a mandatory Environmental Impact Assessment (EIA), that evaluates the impact of the  
91 project and provides necessary minimization and mitigation actions. Although millions of dollars  
92 were invested, these EIAs are widely criticized as overly simplistic and generalist (Fearnside,  
93 2014; Gerlak et al., 2020; Simões et al., 2014).

94            Systematic reviews summarize and evaluate studies, making evidence available for  
95 decision-makers (Gopalakrishnan & Ganeshkumar, 2013). A number of reviews document  
96 impacts of dams across the Amazon (Athayde, Mathews, et al., 2019; Ferreira et al., 2014; Lees  
97 et al., 2016). Recently several studies evaluated the impacts of hydroelectrics on water flow,  
98 sediments, and on aquatic Amazonian species, mostly fishes (Athayde, Mathews, et al., 2019;  
99 Castello et al., 2013; Latrubesse et al., 2017; Turgeon et al., 2021). But these and other reviews  
100 did not evaluate the quality of evidence presented in the primary studies. Indeed, to date there  
101 have been no systematic reviews on the impacts of hydroelectrics on Amazonian vertebrates.

102 In this review, we evaluated the scientific literature reporting hydroelectric impacts on  
103 vertebrates in Brazilian Amazonia. Specifically we addressed the following questions: (1) what  
104 are the temporal and spatial patterns of articles, (2) study designs adopted and (3) evidence types  
105 generated.

106

## 107 **Methods**

### 108 **Study identification and selection**

109 We focused on vertebrates as this group includes fish which is perhaps the most intensively  
110 studied wildlife group in terms of hydropower impacts globally (Algera et al., 2020; Arantes et  
111 al., 2019; Turgeon et al., 2021). Additionally, this group also includes “mega-fauna” (vertebrates  
112 > 30 kg) that have a disproportionately high risk of extinction due to human threats (He et al.,  
113 2018). As such vertebrates should present a best case scenario for the scientific evidence  
114 documenting hydropower impacts on threatened Amazonian wildlife. Searches were conducted  
115 for articles published from 1945 to 2020 using four different databases: ISI Web of Science,

116 SCOPUS, PubMed and Scielo. The databases were searched using the following combination of  
117 terms: (Amazon\*) and (hydroelectric or hydropower or dam) and (mammal or fish or bird or  
118 reptile or amphibian or vertebrate) and (impact\* or effect\*). The same terms were translated and  
119 searches repeated in Portuguese and Spanish. Searches were conducted twice, once on 28 March  
120 2020 and again on 29 March 2021 to update publications from 2020.

121 Studies were selected following guidelines established by the Preferred Reporting Items for a  
122 Systematic Review and Meta-analysis [PRISMA (Moher et al., 2015; Shamseer et al., 2015),  
123 Figure 1]. First, we screened all titles, keywords and abstracts and excluded duplicates and any  
124 studies that were not related to hydroelectric developments and vertebrates within the legal  
125 Brazilian Amazon. The full-text of all articles that passed initial screening was then read to  
126 establish eligibility.

127 As our focus was on evaluating impacts, the studies needed to include results from comparisons  
128 with at least one of the following: control areas (including space-for-time) and/or the impacted  
129 area after the hydroelectric was operational. Selected articles needed to present basic  
130 data/primary studies (Salafsky et al., 2019) from operational hydroelectrics, as such laboratory  
131 experiments, simulations, reviews and meta-analysis were not included. Studies that used novel  
132 reservoir environments to test theories (e.g. species-area relationships on reservoir islands) were  
133 not included. In addition, studies with lists of species compared with other areas in only a  
134 qualitative narrative form or where comparisons were only discussed (not included as part of the  
135 sampling methodology or analysis) were also excluded at this stage.

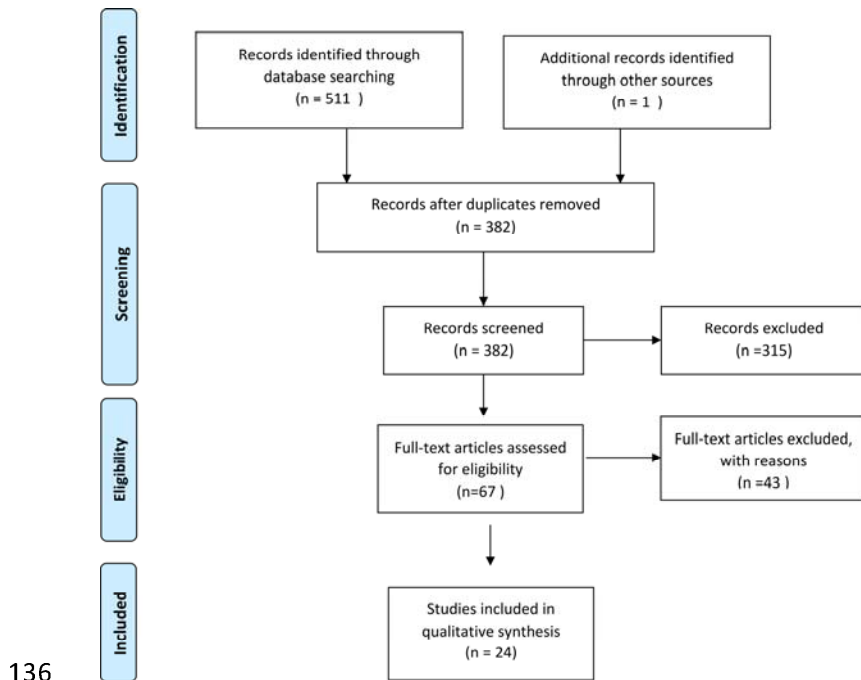

137 Figure 1. PRISMA flow chart. Showing process used to assess and select studies.

138

### 139 Study data extraction

140 Each study was evaluated by one reviewer, who compiled: publication year, vertebrate groups,  
141 period of data collection, study design, geographic coordinates for the studied dams [obtained by  
142 joining dam name with coordinates provided by SIGEL (2021)], evidence type and whether the  
143 study received funding/data from the developer/operator (Supplemental Material Appendix 1).  
144 Study design typology followed definitions in Christie et al. (2019) and evidence types were  
145 classified following Burivalova et al. (2019) (Table 1). Finally the PRISMA process and data  
146 extraction stages were independently reviewed by two researchers (DN and FM) and corrections  
147 made to ensure reproducibility and consistency.

148 Table 1. Study Designs and Evidence Types. Typology used to classify selected studies.  
149 Descriptions summarized from Christie et al. (2019) and Burivalova et al. (2019).

| <b>Study Design</b>                | <b>Description</b>                                                   |
|------------------------------------|----------------------------------------------------------------------|
| <b>After</b>                       | Sampling data post-impact without a control or data before.          |
| <b>Before-After</b>                | Sampling data before and post impact without a control.              |
| <b>Control-Impact</b>              | Sampling data from a control area and compare with post-impact data. |
| <b>Before-After Control-Impact</b> | Sampling data before and post impact with a control.                 |

  

| <b>Evidence type</b>      | <b>Description</b>                                                                                           |
|---------------------------|--------------------------------------------------------------------------------------------------------------|
| <b>Case Report</b>        | Descriptive data from the intervention and its effects, made by interviews, perception or sense of fairness. |
| <b>Case-Control I</b>     | Studies that compare a metric before and after an intervention.                                              |
| <b>Case-Control II</b>    | Studies that compare a metric before and after an intervention taking cofounding variables into account.     |
| <b>Quasi-Experimental</b> | Studies that compare a metric before and after with a control unit similar as possible to treatment units.   |

150

## 151 **Hydroelectric data**

152 To contextualize the literature review we compiled data on the operational hydroelectric plants in  
153 the legal Brazilian Amazon. For each hydroelectric plant we obtained geographic coordinates,  
154 operational start date and power output from the Brazilian Electric Sector Geographic  
155 Information (SIGEL – “Sistema de Informações Georreferenciadas do Setor Elétrico”), provided  
156 and maintained by the Brazilian National Agency of Electricity (ANEEL – “Agência Nacional



157 de Energia Elétrica”, downloaded from: <https://sigel.aneel.gov.br/Down/>, accessed on 30 March  
158 2021). We retained only hydroelectric power plants (HPPs) with an installed power greater than  
159 30 MW (Supplemental Material Appendix 2). We used ArcGIS 10.3 (ESRI, 2015) in order to  
160 produce the final distribution map of the hydroelectric plants and study locations.

161

## 162 **Data Analysis**

163 All analyses were performed in R (R Development Core Team, 2020). Patterns in the geographic  
164 and temporal distribution of publications were evaluated using maps and descriptive analysis. As  
165 Brazilian states are an important administrative and legislative unit for the management of  
166 environmental resources, we compared the distribution of hydroelectrics and publications  
167 between the nine states of the 5 Mkm<sup>2</sup> Legal Brazilian Amazon [Acre, Amapá, Amazonas, Mato  
168 Grosso, Maranhão, Pará, Rondônia, Roraima and Tocantins, (IBGE, 2020)]. The distribution of  
169 study designs and evidence types was compared between studies that i) received funding and/or  
170 data from the hydroelectric developer/operator and ii) independent research studies without any  
171 declared association with the hydroelectric developer/operator.

172

173

## 174 Results

### 175 Temporal and spatial distribution of studies

176 A total of 24 peer-reviewed studies were included in our review most of which (n = 16) were  
177 published between 2015 and 2020 (Figure 2). The first article found in our review was published  
178 in 1981 (Junk et al., 1981). This was four years after the hydroelectric plant under study (“Curuá-  
179 Una”) became operational in 1977 and six years after the first hydroelectric plant became  
180 operational in the legal Brazilian Amazon in 1975 (Figure 2). Although the number of  
181 operational hydroelectrics increased steadily in the subsequent decades, the number of published  
182 articles started to increase only recently (Figure 2). After the first published study there was a 12  
183 year gap until the next publication and few studies (n = 4) were published by 2012, despite there  
184 being 15 operational hydroelectrics in 2010.

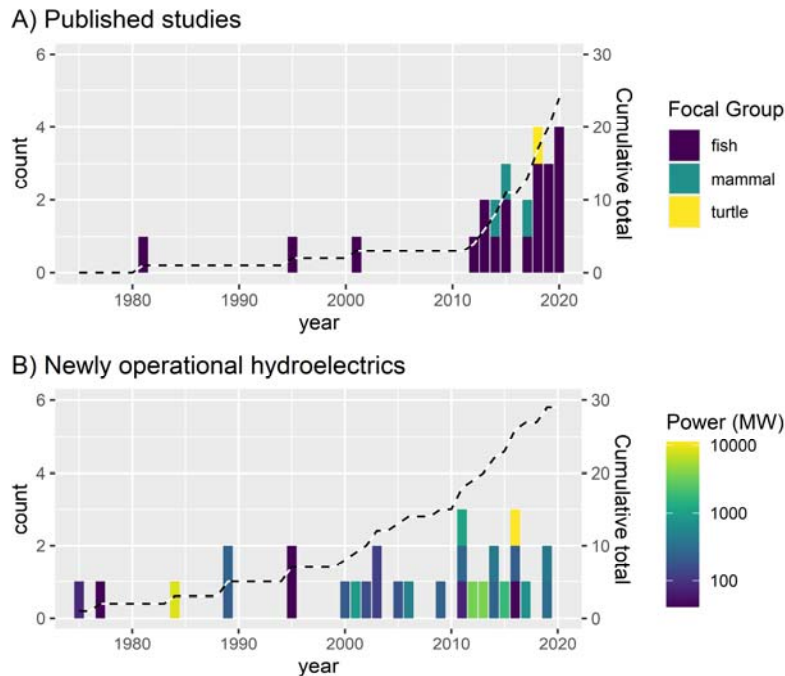

185 Figure 2. Temporal distribution of published studies and operational hydroelectrics. Annual  
186 frequency of A) published articles documenting impacts on vertebrates (n = 24) and B) newly  
187 operational hydroelectrics (n = 29) across the legal Brazilian Amazon. Dashed lines show  
188 cumulative totals.  
189

190

191 Based on our inclusion criteria we were able to identify studies assessing impacts on only three  
192 groups of vertebrates (Figure 2): fish (n = 20), mammals (n = 3) and turtles (n = 1). The major  
193 research interest was related to fish (83.3% of studies) with the four articles published during the  
194 first three decades (1981 – 2013) focusing exclusively on this group (Figure 2). The three  
195 mammal studies (Calaça & de Melo, 2017; Calaça et al., 2015; Palmeirim et al., 2014) were  
196 published between 2014 and 2017 and all focused on the semi-aquatic Giant Otter (*Pteronura*  
197 *brasiliensis*). The study assessing impacts on turtles (Norris et al., 2018) focused on the Yellow-  
198 spotted River Turtle (*Podocnemis unifilis*).

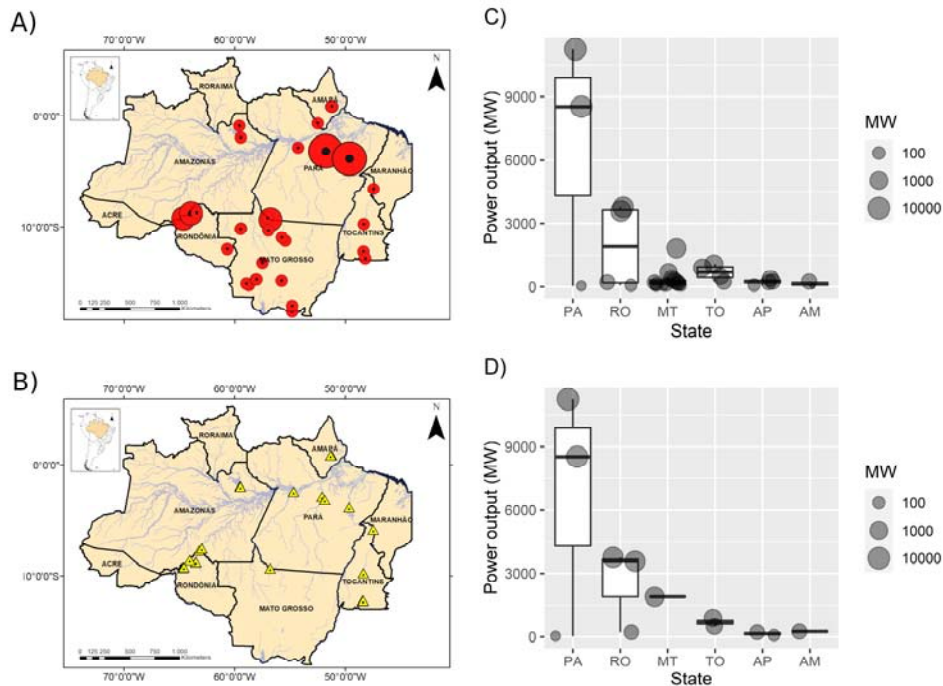

199

200 Figure 3. Spatial distribution of published studies and operational hydroelectrics. Geographic  
201 location of A) operational hydroelectrics (circles, n = 29) and B) studies documenting impacts on  
202 vertebrates (triangles, n = 24) across the legal Brazilian Amazon. The size of the circles showing  
203 hydroelectric locations is proportional to the power output of each hydroelectric, and light grey  
204 lines represent major rivers. Plots show distribution of power output (MW) by C) State of all 29  
205 operational hydroelectric and D) The 12 hydroelectrics included in 24 studies. The sequence of  
206 States is ordered by total power output of operational hydroelectrics in each state (high to low  
207 from left to right).

208

209 The studies assessed impacts caused by 12 of the 29 operational hydroelectric plants. The  
210 distribution of studies tended to follow the power output of the dams in each state (Figure 3) and  
211 we found a positive but insignificant correlation between power output and number of studies per  
212 hydroelectric power plant (Spearman Correlation  $\rho = 0.41$ ,  $p = 0.181$ ). Nearly half of studies ( $n$   
213  $= 11$ ) investigated impacts of three power plants, namely Jirau and Santo Antônio ( $n = 7$ , with 6  
214 studies including both) in the state of Rondônia and Peixe Angical ( $n = 4$ ) in Tocantins. With the  
215 two most intensely studied hydroelectrics (Jirau and Santo Antonio, power output 3750 and  
216 3568 MW respectively) accounting for 7 of the 13 studies published since 2017. The remaining 9  
217 hydroelectric plants had one or two studies each. We also found a weak positive correlation  
218 between the number of hydroelectrics and number of published studies per state (Spearman  
219 Correlation  $\rho = 0.21$ ,  $p = 0.686$ ). Mato Grosso was the state with most hydroelectric power  
220 plants ( $n = 13$ ), but was severely under-represented with only two published studies (Figure 3),  
221 both of which focused around the recently operational Teles Pires dam [1,819 MW, operational  
222 in November 2015, (Calaça & de Melo, 2017; Calaça et al., 2015)].

223

### 224 **Study Design and Evidence Type**

225 Most studies (87.5%) adopted either “After” ( $n = 6$ ) or “Before-After” ( $n = 15$ ) study designs  
226 (Figure 4). Only three studies used a Before-After Control-Impact design, two with fish (Araújo  
227 et al., 2013; Lima et al., 2018) and one with turtles (Norris et al., 2018).

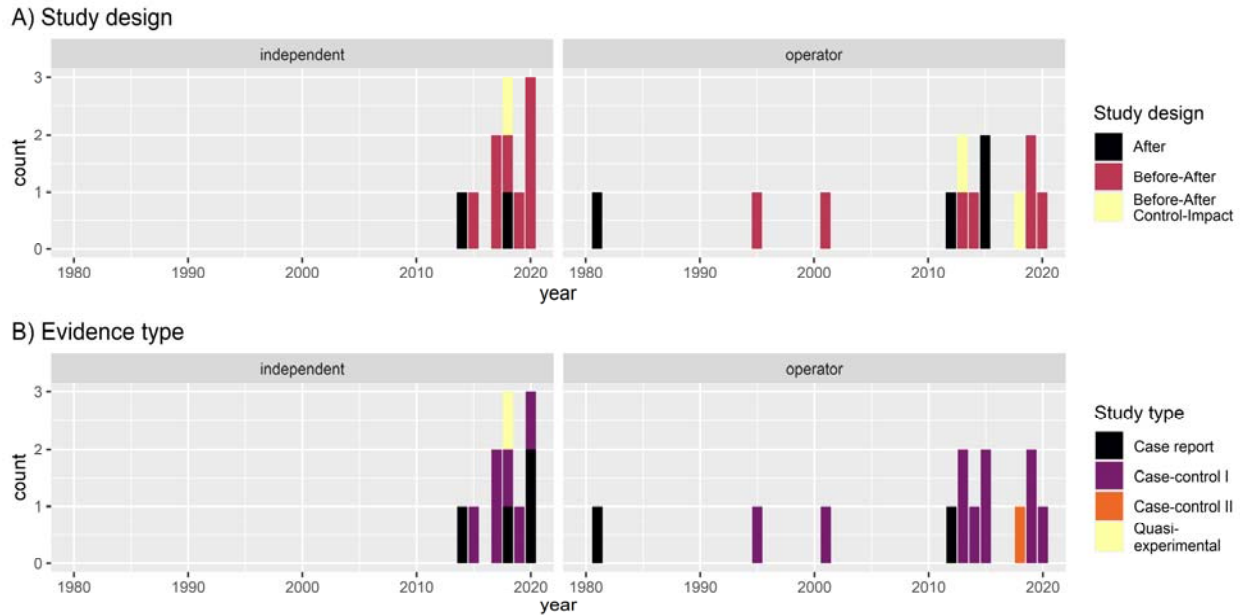

228

229 Figure 4. Temporal distribution of study designs and evidence types. The A) study design used  
230 and B) type of evidence produced by 24 published articles documenting impacts hydroelectric  
231 developments on vertebrates across the legal Brazilian Amazon. Classification follows  
232 previously published definitions of study designs (Christie et al., 2019) and evidence types  
233 (Burivalova et al., 2019). Studies are grouped into those conducted without financial support  
234 from the developer/operator (“independent”) and those that received financial support or data  
235 from the developer/operator (“operator”).

236

237 Most publications (91.7%, n = 22) did not support causal inference, with evidence coming from  
238 either Case-report (n = 6) or Case-Control I (n = 16) studies (Figure 4). Only one Quasi-  
239 Experimental study was found, which included data collected pre and post reservoir formation  
240 with both impacted and control areas and analysis to explicitly test the Before-After Control-  
241 Impact interaction (Norris et al., 2018). The proportion of independent (n = 11) and operator  
242 funded (n = 13) studies was similar (Chi-squared = 0.17, df = 1, p = 0.683) and there was no  
243 significant difference in the frequencies of study designs or evidence types between  
244 independently or operator funded studies (Figure 4, Fisher's Exact Test p = 0.725 and 0.288 for  
245 study designs and evidence types respectively).

246

## 247 **Discussion**

248 Our systematic review showed that (1) studies focused on understanding the impacts of  
249 hydroelectrics on Amazonian vertebrates are increasing, but weak sampling designs resulted in a  
250 lack of robust evidence, (2) the majority of studies focused on fish, and (3) there was a tendency  
251 for studies to be concentrated on high potency “mega” hydropower plants. We first turn to  
252 discuss the lack of evidence due to weak sampling designs and then explore the focus on selected  
253 vertebrate groups, discrepancy on studies focused on large dams and lack of integrated studies.

254 The lack of robust evidence was surprising considering hydropower development impacts are so  
255 strong and well known at a global scale (Grill et al., 2019; Liermann et al., 2012; Maavara et al.,  
256 2020). We found that studies across Brazilian Amazonia were biased by a focus on mega-dams.  
257 A major part of the increasing number of studies since 2012 can be attributed to studies of only  
258 two dams (Jirau and Santo Antonio). Although the sustainability of both projects was questioned  
259 (Fearnside, 2014, 2015), both received certification by Hydropower Sustainability Assessment  
260 Protocol (<https://www.hydrosustainability.org/published-assessments/santo-antonio> and  
261 <https://www.hydrosustainability.org/published-assessments/jirau> , accessed 23 June 2021). Our  
262 results show that scientific evidence documenting the impacts of both was generally weak (i.e.  
263 below expected best practice). A finding that supports recent analysis showing a link between  
264 superficial impact assessments and a lack of social and environmental sustainability of  
265 Amazonian hydropower developments (Fearnside, 2018; Gerlak et al., 2020).

266 We found that studies generally adopted weak sampling designs (e.g. lacking controls) and  
267 lacked evidence necessary to generate reliable inference (Christie et al., 2021; Christie et al.,  
268 2019; Salafsky et al., 2019). Although randomized-control studies are widely recognized as the  
269 most robust, logistically simpler designs such as before-after control-impact can be equally

270 effective in generating robust evidence for impact assessments of abrupt changes induced by  
271 large scale development projects including dam construction. Additionally, dams are so  
272 widespread across Amazonia (Anderson et al., 2018; Athayde, Duarte, et al., 2019; Grill et al.,  
273 2019) that there are few remaining free flowing river sections that could be included within a  
274 randomized-control design.

275 Most of the studies found in our review focused on fishes and are therefore likely to represent  
276 best-case scenario in terms of scientific knowledge and evidence base. In fact, this finding  
277 follows global patterns where fishes were one of the most frequently studied groups used to  
278 evaluate effects of hydroelectric dams in both temperate (Algera et al., 2020) and tropical regions  
279 (Arantes et al., 2019). But, impacts of run-of-river dams are poorly studied even for fish the most  
280 intensively studied group (Turgeon et al., 2021). Moreover, there is a lack of studies on multiple  
281 vertebrate groups, which is essential to understand hydroelectric effects on complex hydrological  
282 systems such as the Amazon (Park & Latrubesse, 2017).

283 As impacts are so poorly understood it is also unsurprising that there is limited evidence  
284 documenting the effectiveness of mitigation actions for vertebrates impacted by hydropower  
285 developments across Amazonia. For example, from a total of 48 actions identified in the  
286 Conservation Evidence database  
287 ([https://www.conservationevidence.com/data/index?pp=50&terms=dam&country%5B%5D=&result\\_type=interventions&sort=relevance.desc#searchcontainer](https://www.conservationevidence.com/data/index?pp=50&terms=dam&country%5B%5D=&result_type=interventions&sort=relevance.desc#searchcontainer), accessed 14 July 2021) there  
288 were no studies from the Amazon basin. Although it is possible to suggest some general actions  
289 based on documented global experiences, no studies have evaluated effects of installing bypasses  
290 channels for aquatic mammals (Berthinussen et al., 2021) and only three short-term studies (10  
291 to 18 months) evaluated translocations, two in French Guiana, both for primates (Richard-

293 Hansen et al., 2000; Vié et al., 2001) and one in central Brazil for lesser anteater (Rodrigues et  
294 al., 2009). Indeed, to date no studies have implemented or evaluated mitigation actions that are  
295 likely to generate multiple conservation benefits such as habitat restoration.

296 Our review showed a lack of studies assessing multiple hydroelectrics and/or multiple vertebrate  
297 groups along the same river. In Brazil, several hydroelectric plants belonging to different  
298 operators are commonly arranged in the same river, creating “cascades” (Athayde, Duarte, et al.,  
299 2019; Mendes et al., 2017). Although many studies focus on mega-dams, the combined effect of  
300 multiple hydroelectrics, which can cause cumulative impacts (Athayde, Duarte, et al., 2019)  
301 remains poorly documented. For example, Coaracy Nunes was the first dam installed in the legal  
302 Brazilian Amazon in 1975, since then two additional dams have become operational along the  
303 same river, providing a total of three dams with a combined output of 549 MW (78, 252 and 219  
304 MW) within a 18 km stretch of river. The impact of these multiple dams is thought to have  
305 drastically altered both upstream and downstream flow rates and following the installation of the  
306 second dam (Ferreira Gomes) in 2014 the rivers downstream course became divided, draining  
307 predominantly to the Amazon river not the Atlantic Ocean (Silva dos Santos, 2017). Whilst  
308 individual studies focus on fish (Sá-Oliveira et al., 2015; Sá-Oliveira et al., 2016) and turtles  
309 (Norris et al., 2018; Norris et al., 2020) along the impacted river, these studies focused on  
310 different dams and adopted different sampling designs, which limits the ability to integrate  
311 results for important basin wide analysis necessary to inform mitigation actions.

312 We failed to find studies including important cofounding impacts such as deforestation (Stickler  
313 et al., 2013). Although deforestation and tree mortality have been widely documented as  
314 important impacts of Amazonian dams (Athayde, Mathews, et al., 2019; Resende et al., 2019;  
315 Stickler et al., 2013) no studies included these important cofounding variables in the assessments



316 of vertebrates. For example, the lack of studies in Mato Grosso was particularly surprising  
317 considering previous studies on effects of forest fragmentation on vertebrates in this state  
318 (Michalski & Peres, 2007; Norris & Michalski, 2009).

319 We found few studies considering the overall number and investment in hydropower projects  
320 across the Legal Brazilian Amazonia. Even fewer studies were found when considering only  
321 those with a robust design and able to establish causal inference. It could be suggested that weak  
322 evidence is a reflection of a lack of investment in science and technology, together with a  
323 reduction in investment in the Brazilian Ministry of the Environment over the past twenty years  
324 (de Area Leão Pereira et al., 2019). Although there is undoubtedly support for such  
325 considerations, the lack of robust survey designs can also perhaps be attributed more simply to a  
326 failure of researchers to adopt robust designs (Christie et al., 2021; Christie et al., 2019).

327 However, we need to highlight that our review has some limitations, as we did not include “grey  
328 literature” in our searches. Thus, it is important to recognize the potential for gaps or missing  
329 studies that were not published in peer-reviewed journals. On the other hand, as we would expect  
330 published studies to have more robust designs and analysis compared with grey literature or  
331 reports, our review, performed in searches across four different databases and in three languages  
332 is likely to be a best-case representation of the scientific evidence base documenting  
333 hydroelectric impacts on vertebrates in the Brazilian Amazonia.

334

### 335 **Implications for conservation**

336 There is an urgent need to take advantage of freely available data to organize and plan effective  
337 surveys and sampling strategies to evaluate sustainability of current and future hydroelectric

338 across the Brazilian Amazon. Below we provide recommendations to help develop a more robust  
339 evidence base.

340 1. **Geographical distribution of studies.**

341 **Research gaps:** Studies were focused within specific regions

342 **Future directions:** Increase the number of studies all around Brazilian Amazon with a  
343 focus in Mato Grosso state, which has more than 50% of operational and planned  
344 hydroelectrics.

345 2. **Study groups.**

346 **Research gaps:** The majority of studies focus on understanding the impacts on fish.

347 **Future directions:** Increase studies focusing on other threatened vertebrate groups  
348 including amphibians, birds, mammals, and reptiles.

349 3. **Hydroelectric power plants.**

350 **Research gaps:** Most of our reviewed studies were concentrated in three large  
351 hydroelectric power plants.

352 **Future directions:** Increase number of studies to represent the distribution of operational  
353 and planned power output. This should include closer integration with university research  
354 teams to develop robust evidence as part of the necessary Environmental Impact  
355 Assessments.

356 4. **Study design and evidence.**

357 **Research gaps:** There is currently a lack of robust evidence to evaluate impacts of  
358 hydroelectric power plants on Amazonian wildlife.

359 **Future directions:** Studies need to include more robust designs (e.g. Before-After  
360 Control-Impact) to establish causal inference.

361

362 **Acknowledgements**

363 The Federal University of Amapá (UNIFAP) provided logistical support.

364

365 **Declaration of Conflicting Interests**

366 The author(s) declared no potential conflicts of interest with respect to the research, authorship,  
367 and/or publication of this article.

368

369 **Funding**

370 The author(s) disclosed receipt of the following financial support for the research, authorship,  
371 and/or publication of this article: The data presented here were collected during ERS's master  
372 study, which was funded by a studentship from the Brazilian Federal Agency for Support and  
373 Evaluation of Graduate Education, Ministry of Education ("Coordenação de Aperfeiçoamento de  
374 Pessoal de Nível Superior" – CAPES —Grant: 675849). FM receives a productivity scholarship  
375 from CNPq (Grant: Process 302806/2018-0) and was funded by CNPq (Grant: 403679/2016-8).

376

## 377 References

- 378 Algera, D. A., Rytwinski, T., Taylor, J. J., Bennett, J. R., Smokorowski, K. E., Harrison, P. M., . . . Cooke, S. J.  
379 (2020). What are the relative risks of mortality and injury for fish during downstream passage at  
380 hydroelectric dams in temperate regions? A systematic review. *Environmental Evidence*, 9(1), 3.  
381 doi:[10.1186/s13750-020-0184-0](https://doi.org/10.1186/s13750-020-0184-0)
- 382 Anderson, E. P., Jenkins, C. N., Heilpern, S., Maldonado-Ocampo, J. A., Carvajal-Vallejos, F. M., Encalada,  
383 A. C., . . . Tedesco, P. A. (2018). Fragmentation of Andes-to-Amazon connectivity by hydropower  
384 dams. *Sci Adv*, 4(1), eaao1642. doi:[10.1126/sciadv.aao1642](https://doi.org/10.1126/sciadv.aao1642)
- 385 Arantes, C. C., Fitzgerald, D. B., Hoinghaus, D. J., & Winemiller, K. O. (2019). Impacts of hydroelectric  
386 dams on fishes and fisheries in tropical rivers through the lens of functional traits. *Current*  
387 *Opinion in Environmental Sustainability*, 37, 28-40.  
388 doi:<https://doi.org/10.1016/j.cosust.2019.04.009>
- 389 Araújo, E. S., Marques, E. E., Freitas, I. S., Neuberger, A. L., Fernandes, R., & Pelicice, F. M. (2013).  
390 Changes in distance decay relationships after river regulation: similarity among fish assemblages  
391 in a large Amazonian river. *Ecology of Freshwater Fish*, 22(4), 543-552.  
392 doi:<https://doi.org/10.1111/eff.12054>
- 393 Athayde, S., Duarte, C. G., Gallardo, A. L. C. F., Moretto, E. M., Sangoi, L. A., Dibo, A. P. A., . . . Sánchez, L.  
394 E. (2019). Improving policies and instruments to address cumulative impacts of small  
395 hydropower in the Amazon. *Energy Policy*, 132, 265-271.  
396 doi:<https://doi.org/10.1016/j.enpol.2019.05.003>
- 397 Athayde, S., Mathews, M., Bohlman, S., Brasil, W., Doria, C., Dutka-Gianelli, J., . . . Kaplan, D. (2019).  
398 Mapping research on hydropower and sustainability in the Brazilian Amazon: advances, gaps in  
399 knowledge and future directions. *Current Opinion in Environmental Sustainability*, 37, 50-69.  
400 doi:<https://doi.org/10.1016/j.cosust.2019.06.004>
- 401 Aurelio-Silva, M., Ancaes, M., Henriques, L. M. P., Benchimol, M., & Peres, C. A. (2016). Patterns of local  
402 extinction in an Amazonian archipelagic avifauna following 25 years of insularization. *Biological*  
403 *Conservation*, 199, 101-109. doi:<https://doi.org/10.1016/j.biocon.2016.03.016>
- 404 Benchimol, M., & Peres, C. A. (2015). Widespread Forest Vertebrate Extinctions Induced by a Mega  
405 Hydroelectric Dam in Lowland Amazonia. *Plos One*, 10(7).  
406 doi:<https://doi.org/10.1371/journal.pone.0129818>
- 407 Berthinussen, A., Smith, R. K., & Sutherland, W. J. (2021). *Marine and Freshwater Mammal Conservation:*  
408 *Global Evidence for the Effects of Interventions. Conservation Evidence Series Synopses.*  
409 Retrieved from <https://www.conservationalevidence.com/synopsis/pdf/30>
- 410 Böhm, M., Collen, B., Baillie, J., Bowles, P., Chanson, J., Cox, N., . . . Zug, G. (2013). The Conservation  
411 Status of the World's Reptiles. *Biological Conservation*, 157, 372-385.  
412 doi:<https://doi.org/10.1016/j.biocon.2012.07.015>
- 413 Bueno, A. S., & Peres, C. A. (2019). Patch-scale biodiversity retention in fragmented landscapes:  
414 Reconciling the habitat amount hypothesis with the island biogeography theory. *Journal of*  
415 *Biogeography*, 46(3), 621-632. doi:<https://doi.org/10.1111/jbi.13499>
- 416 Burivalova, Z., Miteva, D., Salafsky, N., Butler, R. A., & Wilcove, D. S. (2019). Evidence Types and Trends  
417 in Tropical Forest Conservation Literature. *Trends in Ecology & Evolution*, 34(7), 669-679.  
418 doi:<https://doi.org/10.1016/j.tree.2019.03.002>
- 419 Calaça, A. M., & de Melo, F. R. (2017). Reestablishment of giant otters in habitats altered by the filling of  
420 the Teles Pires hydroelectric dam in the Amazonia. *IUCN Otter Specialist Group Bulletin*, 34(2),  
421 73-78.

- 422 Calaça, A. M., Faedo, O. J., & de Melo, F. R. (2015). Hydroelectric Dams: The First Responses from Giant  
423 Otters to a Changing Environment. *IUCN Otter Spec. Group Bull*, 32(1), 48-58.
- 424 Carvalho, D. N., Boniolo, M. R., Santos, R. G., Batista, L. V., Malavazzi, A. A., Reis, F. A. G. V., & Giordano,  
425 L. d. C. (2018). Criteria applied in the definition of influence areas, impacts and programmes in  
426 environmental impact studies of Brazilian hydroelectric power plants. *Geociencias - UNESP*, 37,  
427 15.
- 428 Castello, L., McGrath, D. G., Hess, L. L., Coe, M. T., Lefebvre, P. A., Petry, P., . . . Arantes, C. C. (2013). The  
429 vulnerability of Amazon freshwater ecosystems. *Conservation Letters*, 6(4), 217-229.  
430 doi:<https://doi.org/10.1111/cons.12008>
- 431 Christie, A. P., Amano, T., Martin, P. A., Petrovan, S. O., Shackelford, G. E., Simmons, B. I., . . . Sutherland,  
432 W. J. (2021). The challenge of biased evidence in conservation. *Conservation Biology*, 35(1), 249-  
433 262. doi:<https://doi.org/10.1111/cobi.13577>
- 434 Christie, A. P., Amano, T., Martin, P. A., Shackelford, G. E., Simmons, B. I., & Sutherland, W. J. (2019).  
435 Simple study designs in ecology produce inaccurate estimates of biodiversity responses. *Journal*  
436 *of Applied Ecology*, 56(12), 2742-2754. doi:<https://doi.org/10.1111/1365-2664.13499>
- 437 Cosson, J. F., Ringuet, S., Claessens, O., de Massary, J. C., Dalecky, A., Villiers, J. F., . . . Pons, J. M. (1999).  
438 Ecological changes in recent land-bridge islands in French Guiana, with emphasis on vertebrate  
439 communities. *Biological Conservation*, 91(2-3), 213-222. doi:[https://doi.org/10.1016/s0006-  
440 3207\(99\)00091-9](https://doi.org/10.1016/s0006-3207(99)00091-9)
- 441 de Area Leão Pereira, E. J., Silveira Ferreira, P. J., de Santana Ribeiro, L. C., Sabadini Carvalho, T., & de  
442 Barros Pereira, H. B. (2019). Policy in Brazil (2016–2019) threaten conservation of the Amazon  
443 rainforest. *Environmental Science & Policy*, 100, 8-12.  
444 doi:<https://doi.org/10.1016/j.envsci.2019.06.001>
- 445 Dirzo, R., & Raven, P. H. (2003). Global State of Biodiversity and Loss. *Annual Review of Environment and*  
446 *Resources*, 28(1), 137-167. doi:<https://doi.org/10.1146/annurev.energy.28.050302.105532>
- 447 Dudgeon, D., Arthington, A. H., Gessner, M. O., Kawabata, Z. I., Knowler, D. J., Leveque, C., . . . Sullivan,  
448 C. A. (2006). Freshwater biodiversity: importance, threats, status and conservation challenges.  
449 *Biological Reviews*, 81(2), 163-182. doi:<https://doi.org/10.1017/s1464793105006950>
- 450 Egré, D., & Milewski, J. C. (2002). The diversity of hydropower projects. *Energy Policy*, 30(14), 1225-  
451 1230. doi:[https://doi.org/10.1016/S0301-4215\(02\)00083-6](https://doi.org/10.1016/S0301-4215(02)00083-6)
- 452 ESRI. (2015). ArcGIS Desktop: Release 10.3. Redlands, CA: Environmental Systems Research Institute.
- 453 Fearnside, P. M. (1989). Brazil's Balbina Dam: Environment versus the legacy of the Pharaohs in  
454 Amazonia. *Environ Manage*, 13(4), 401-423. doi:<https://doi.org/10.1007/BF01867675>
- 455 Fearnside, P. M. (2001). Environmental impacts of Brazil's Tucuruí Dam: unlearned lessons for  
456 hydroelectric development in Amazonia. *Environ Manage*, 27(3), 377-396.  
457 doi:<https://doi.org/10.1007/s002670010156>
- 458 Fearnside, P. M. (2006). Dams in the Amazon: Belo Monte and Brazil's Hydroelectric Development of the  
459 Xingu River Basin. *Environ Manage*, 38(1), 16. doi:<https://doi.org/10.1007/s00267-005-0113-6>
- 460 Fearnside, P. M. (2014). Impacts of Brazil's Madeira River Dams: Unlearned lessons for hydroelectric  
461 development in Amazonia. *Environmental Science & Policy*, 38, 164-172.  
462 doi:<https://doi.org/10.1016/j.envsci.2013.11.004>
- 463 Fearnside, P. M. (2015). Tropical hydropower in the clean development mechanism: Brazil's Santo  
464 Antônio Dam as an example of the need for change. *Climatic Change*, 131(4), 575-589.  
465 doi:<https://doi.org/10.1007/s10584-015-1393-3>
- 466 Fearnside, P. M. (2018). Challenges for sustainable development in Brazilian Amazonia. *Sustainable*  
467 *Development*, 26(2), 141-149. doi:<https://doi.org/10.1002/sd.1725>

- 468 Ferreira, J., Aragão, L. E. O. C., Barlow, J., Barreto, P., Berenguer, E., Bustamante, M., . . . Zuanon, J.  
469 (2014). Brazil's environmental leadership at risk. *Science*, 346(6210), 706.  
470 doi:<https://doi.org/10.1126/science.1260194>
- 471 Finer, M., & Jenkins, C. N. (2012). Proliferation of hydroelectric dams in the Andean Amazon and  
472 implications for Andes-Amazon connectivity. *Plos One*, 7(4), e35126-e35126.  
473 doi:<https://doi.org/10.1371/journal.pone.0035126>
- 474 Fletcher, D., Hopkins, W., Saldaña, T., Baionno, J., Arribas, C., Standora, M., & Fernandez-Delgado, C.  
475 (2006). Geckos as indicators of mining pollution. *Environmental toxicology and chemistry /*  
476 *SETAC*, 25, 2432-2445. doi:<https://doi.org/10.1897/05-556R.1>
- 477 Gerlak, A. K., Saguier, M., Mills-Novoa, M., Fearnside, P. M., & Albrecht, T. R. (2020). Dams, Chinese  
478 investments, and EIAs: A race to the bottom in South America? *Ambio*, 49(1), 156-164.  
479 doi:<https://doi.org/10.1007/s13280-018-01145-y>
- 480 Gopalakrishnan, S., & Ganeshkumar, P. (2013). Systematic reviews and meta-analysis: Understanding  
481 the best evidence in primary healthcare. 2(1), 9-14. doi:<https://doi.org/10.4103/2249-4863.109934>
- 482
- 483 Grill, G., Lehner, B., Thieme, M., Geenen, B., Tickner, D., Antonelli, F., . . . Zarfl, C. (2019). Mapping the  
484 world's free-flowing rivers. *Nature*, 569(7755), 215-221. doi:<https://doi.org/10.1038/s41586-019-1111-9>
- 485
- 486 Hall, A., & Branford, S. (2012). Development, Dams and Dilma: the Saga of Belo Monte. *Critical*  
487 *Sociology*, 38(6), 851-862. doi:<https://doi.org/10.1177/0896920512440712>
- 488 He, F., Bremerich, V., Zarfl, C., Geldmann, J., Langhans, S. D., David, J. N. W., . . . Jähnig, S. C. (2018).  
489 Freshwater megafauna diversity: patterns, status and threats. *Diversity Distributions*, 24(10),  
490 1395-1404. doi:<https://doi.org/10.1111/ddi.12780>
- 491 IBGE. (2020). Legal Amazon Boundaries for 2019 [Press release]. Retrieved from  
492 <https://censos.ibge.gov.br/en/2185-news-agency/releases-en/28109-ibge-updates-map-of-the-legal-amazon.html>
- 493
- 494 IUCN. (2020). The IUCN Red List of Threatened Species. .
- 495 Janzen, D. H. (1970). Herbivores and the Number of Tree Species in Tropical Forests. 104(940), 501-528.  
496 doi:<https://doi.org/10.1086/282687>
- 497 Jenkins, C. N., Alves, M. A. S., Uezu, A., & Vale, M. M. (2015). Patterns of Vertebrate Diversity and  
498 Protection in Brazil. *Plos One*, 10(12), e0145064.  
499 doi:<https://doi.org/10.1371/journal.pone.0145064>
- 500 Jézéquel, C., Tedesco, P. A., Bigorne, R., Maldonado-Ocampo, J. A., Ortega, H., Hidalgo, M., . . .  
501 Oberdorff, T. (2020). A database of freshwater fish species of the Amazon Basin. *Scientific Data*,  
502 7(1), 96. doi:<https://doi.org/10.1038/s41597-020-0436-4>
- 503 Junk, W. J., Robertson, B. A., Darwich, A. J., & Vieira, I. (1981). Investigações limnológicas e ictiológicas  
504 em Curuá-Una, a primeira represa hidrelétrica na Amazônia Central. *Acta Amazonica*, 11(4),  
505 689-717. doi:<https://doi.org/10.1590/1809-43921981114689>
- 506 Latrubesse, E. M., Arima, E. Y., Dunne, T., Park, E., Baker, V. R., d'Horta, F. M., . . . Stevaux, J. C. (2017).  
507 Damming the rivers of the Amazon basin. *Nature*, 546(7658), 363-369.  
508 doi:<https://doi.org/10.1038/nature22333>
- 509 Laurance, W. F., Camargo, J. L. C., Luizao, R. C. C., Laurance, S. G., Pimm, S. L., Bruna, E. M., . . . Lovejoy,  
510 T. E. (2011). The fate of Amazonian forest fragments: A 32-year investigation. *Biological*  
511 *Conservation*, 144(1), 56-67. doi:<https://doi.org/10.1016/j.biocon.2010.09.021>
- 512 Lees, A. C., Peres, C. A., Fearnside, P. M., Schneider, M., & Zuanon, J. A. S. (2016). Hydropower and the  
513 future of Amazonian biodiversity. *Biodiversity and Conservation*, 25(3), 451-466.  
514 doi:<https://doi.org/10.1007/s10531-016-1072-3>

- 515 Li, J. S., Lin, X., Chen, A. P., Peterson, T., Ma, K. P., Bertzky, M., . . . Poulter, B. (2013). Global Priority  
516 Conservation Areas in the Face of 21st Century Climate Change. *Plos One*, 8(1), 9.  
517 doi:<https://doi.org/10.1371/journal.pone.0054839>
- 518 Liermann, C. R., Nilsson, C., Robertson, J., & Ng, R. Y. (2012). Implications of Dam Obstruction for Global  
519 Freshwater Fish Diversity. *BioScience*, 62(6), 539-548. doi:10.1525/bio.2012.62.6.5
- 520 Lima, A. C., Sayanda, D., Agostinho, C. S., Machado, A. L., Soares, A. M. V. M., & Monaghan, K. A. (2018).  
521 Using a trait-based approach to measure the impact of dam closure in fish communities of a  
522 Neotropical River. *Ecology of Freshwater Fish*, 27(1), 408-420.  
523 doi:<https://doi.org/10.1111/eff.12356>
- 524 Maavara, T., Chen, Q., Van Meter, K., Brown, L. E., Zhang, J., Ni, J., & Zarfl, C. (2020). River dam impacts  
525 on biogeochemical cycling. *Nature Reviews Earth & Environment*, 1(2), 103-116.  
526 doi:<https://doi.org/10.1038/s43017-019-0019-0>
- 527 Malhi, Y., Roberts, J. T., Betts, R. A., Killeen, T. J., Li, W. H., & Nobre, C. A. (2008). Climate change,  
528 deforestation, and the fate of the Amazon. *Science*, 319(5860), 169-172.  
529 doi:<https://doi.org/10.1126/science.1146961>
- 530 Mendes, C. A. B., Beluco, A., & Canales, F. A. (2017). Some important uncertainties related to climate  
531 change in projections for the Brazilian hydropower expansion in the Amazon. *Energy*, 141, 123-  
532 138. doi:<https://doi.org/10.1016/j.energy.2017.09.071>
- 533 Mendes, Y. A., Oliveira, R. S., Montag, L. F. A., Andrade, M. C., Giarrizzo, T., Rocha, R. M., & Auxiliadora  
534 P. Ferreira, M. (2021). Sedentary fish as indicators of changes in the river flow rate after  
535 impoundment. *Ecological Indicators*, 125, 107466.  
536 doi:<https://doi.org/10.1016/j.ecolind.2021.107466>
- 537 Michalski, F., & Peres, C. A. (2007). Disturbance-Mediated Mammal Persistence and Abundance-Area  
538 Relationships in Amazonian Forest Fragments. *Conservation Biology*, 21(6), 1626-1640.  
539 doi:<https://doi.org/10.1111/j.1523-1739.2007.00797.x>
- 540 Moher, D., Shamseer, L., Clarke, M., Ghersi, D., Liberati, A., Petticrew, M., . . . Group, P.-P. (2015).  
541 Preferred reporting items for systematic review and meta-analysis protocols (PRISMA-P) 2015  
542 statement. *Systematic Reviews*, 4(1), 1. doi:<https://doi.org/10.1186/2046-4053-4-1>
- 543 Norris, D., & Michalski, F. (2009). Are otters an effective flagship for the conservation of riparian  
544 corridors in an Amazon deforestation frontier. *IUCN Otter Spec. Group Bull*, 26(2), 72-76.
- 545 Norris, D., Michalski, F., & Gibbs, J. P. (2018). Beyond harm's reach? Submersion of river turtle nesting  
546 areas and implications for restoration actions after Amazon hydropower development. *PeerJ*, 6,  
547 e4228. doi:<https://doi.org/10.7717/peerj.4228>
- 548 Norris, D., Michalski, F., & Gibbs, J. P. (2020). Community based actions save Yellow-spotted river turtle  
549 (*Podocnemis unifilis*) eggs and hatchlings flooded by rapid river level rises. *PeerJ*, 8, e9921.  
550 doi:10.7717/peerj.9921
- 551 Palmeirim, A. F., Peres, C. A., & Rosas, F. C. W. (2014). Giant otter population responses to habitat  
552 expansion and degradation induced by a mega hydroelectric dam. *Biological Conservation*, 174,  
553 30-38. doi:<https://doi.org/10.1016/j.biocon.2014.03.015>
- 554 Palmeirim, A. F., Vieira, M. V., & Peres, C. A. (2017). Non-random lizard extinctions in land-bridge  
555 Amazonian forest islands after 28 years of isolation. *Biological Conservation*, 214, 55-65.  
556 doi:<https://doi.org/10.1016/j.biocon.2017.08.002>
- 557 Park, E., & Latrubesse, E. M. (2017). The hydro-geomorphologic complexity of the lower Amazon River  
558 floodplain and hydrological connectivity assessed by remote sensing and field control. *Remote  
559 Sensing of Environment*, 198, 321-332. doi:<https://doi.org/10.1016/j.rse.2017.06.021>
- 560 R Development Core Team. (2020). R: A language and environment for statistical computing. Vienna,  
561 Austria: R Foundation for Statistical Computing.

- 562 Raxworthy, C., Pearson, R., Zimkus, B., Reddy, S., Deo, A., Nussbaum, R., & Ingram, C. (2008). Continental  
563 speciation in the tropics: Contrasting biogeographic patterns of divergence in the Uroplatus leaf-  
564 tailed gecko radiation of Madagascar. *Journal of Zoology*, 275, 423-440.  
565 doi:<https://doi.org/10.1111/j.1469-7998.2008.00460.x>
- 566 Resende, A. F. d., Schöngart, J., Streher, A. S., Ferreira-Ferreira, J., Piedade, M. T. F., & Silva, T. S. F.  
567 (2019). Massive tree mortality from flood pulse disturbances in Amazonian floodplain forests:  
568 The collateral effects of hydropower production. *Science of The Total Environment*, 659, 587-  
569 598. doi:<https://doi.org/10.1016/j.scitotenv.2018.12.208>
- 570 Richard-Hansen, C., Vié, J. C., & de Thoisy, B. t. (2000). Translocation of red howler monkeys (*Alouatta*  
571 *seniculus*) in French Guiana. *Biological Conservation*, 93(2), 247-253.  
572 doi:[https://doi.org/10.1016/S0006-3207\(99\)00136-6](https://doi.org/10.1016/S0006-3207(99)00136-6)
- 573 Rodrigues, F. H. G., Marinho-Filho, J., & dos Santos, H. G. (2009). Home ranges of translocated lesser  
574 anteaters *Tamandua tetradactyla* in the cerrado of Brazil. *Oryx*, 35(2), 166-169.  
575 doi:10.1046/j.1365-3008.2001.00162.x
- 576 Rytwinski, T., Harper, M., Taylor, J. J., Bennett, J. R., Donaldson, L. A., Smokorowski, K. E., . . . Cooke, S. J.  
577 (2020). What are the effects of flow-regime changes on fish productivity in temperate regions?  
578 A systematic map. *Environmental Evidence*, 9(1), 7. doi:10.1186/s13750-020-00190-z
- 579 Sá-Oliveira, J. C., Hawes, J. E., Isaac-Nahum, V. J., & Peres, C. A. (2015). Upstream and downstream  
580 responses of fish assemblages to an eastern Amazonian hydroelectric dam. *Freshwater Biology*,  
581 60(10), 2037-2050. doi:<https://doi.org/10.1111/fwb.12628>
- 582 Sá-Oliveira, J. C., Isaac, V. J., Araújo, A. S., & Ferrari, S. F. (2016). Factors Structuring the Fish Community  
583 in the Area of the Coaracy Nunes Hydroelectric Reservoir in Amapá, Northern Brazil. *Tropical*  
584 *Conservation Science*, 9(1), 16-33. doi:<https://doi.org/10.1177/194008291600900103>
- 585 Salafsky, N., Boshoven, J., Burivalova, Z., Dubois, N. S., Gomez, A., Johnson, A., . . . Wordley, C. F. R.  
586 (2019). Defining and using evidence in conservation practice. *Conservation Science and Practice*,  
587 1(5), e27. doi:<https://doi.org/10.1111/csp2.27>
- 588 Schneider, M., Biedzicki de Marques, A. A., & Peres, C. A. (2021). Brazil's Next Deforestation Frontiers.  
589 *Tropical Conservation Science*, 14, 19400829211020472.  
590 doi:<https://doi.org/10.1177/19400829211020472>
- 591 Shamseer, L., Moher, D., Clarke, M., Ghersi, D., Liberati, A., Petticrew, M., . . . Stewart, L. A. (2015).  
592 Preferred reporting items for systematic review and meta-analysis protocols (PRISMA-P) 2015:  
593 elaboration and explanation. *British Medical Journal*, 349, g7647.  
594 doi:<https://doi.org/10.1136/bmj.g7647>
- 595 SIGEL. (2021). Sistema de Informações Georreferenciadas do Setor Elétrico. Available from Agência  
596 Nacional de Energia Elétrica Sistema de Informações Georreferenciadas do Setor Elétrico  
597 Retrieved 30 March 2021, from ANEEL <https://sigel.aneel.gov.br/Down/>
- 598 Silva dos Santos, E. (2017). *Alterações geomorfológicas no baixo rio Araguari e seus impactos na*  
599 *hidrodinâmica e na qualidade da água*. (PhD), Universidade Federal do Amapa. Retrieved from  
600 <https://www2.unifap.br/ppgbio/files/2018/03/Santos-2017-Tese-de-Doutorado.pdf>
- 601 Silva, J. M. C. d., Rylands, A. B., & Gustavo, A. B. d. F. (2005). The Fate of the Amazonian Areas of  
602 Endemism. *Conservation Biology*, 19(3), 689-694. doi:<https://doi.org/10.1111/j.1523-1739.2005.00705.x>
- 603
- 604 Simões, P. I., Stow, A., Hödl, W., Amézquita, A., Farias, I. P., & Lima, A. P. (2014). The Value of Including  
605 Intraspecific Measures of Biodiversity in Environmental impact Surveys is Highlighted by the  
606 Amazonian Brilliant-Thighed Frog (*Allobates femoralis*). *Tropical Conservation Science*, 7(4), 811-  
607 828. doi:<https://doi.org/10.1177/194008291400700416>
- 608 Stickler, C. M., Coe, M. T., Costa, M. H., Nepstad, D. C., McGrath, D. G., Dias, L. C. P., . . . Soares-Filho, B.  
609 S. (2013). Dependence of hydropower energy generation on forests in the Amazon Basin at local



610 and regional scales. *Proceedings of the National Academy of Sciences*, 110(23), 9601.  
611 doi:<https://doi.org/10.1073/pnas.1215331110>  
612 Turgeon, K., Trottier, G., Turpin, C., Bulle, C., & Margni, M. (2021). Empirical characterization factors to  
613 be used in LCA and assessing the effects of hydropower on fish richness. *Ecological Indicators*,  
614 121, 107047. doi:<https://doi.org/10.1016/j.ecolind.2020.107047>  
615 Vié, J.-C., Richard-Hansen, C., & Fournier-Chambrillon, C. (2001). Abundance, use of space, and activity  
616 patterns of white-faced sakis (*Pithecia pithecia*) in French Guiana. *American Journal of*  
617 *Primatology*, 55(4), 203-221. doi:<https://doi.org/10.1002/ajp.1055>  
618
